# Supplementary material for: Subduction–Accretion History of the Paleo-Pacific Plate Beneath the Eurasian Continent: Evidence from the Tongjiang Accretionary Complex, NE China
Source: MDPI journal article supplement (doi:10.3390/min13081038), 2023-08-03
Supplement: s1 [file s1]

**Table S1.** LA-ICP-MS U-Pb data of zircons from Tongjiang accretionary complex matrix.

| Spot       | Th/ppm | U/ppm | Th/U | <sup>207</sup> Pb/ <sup>206</sup> Pb |         | <sup>207</sup> Pb/ <sup>235</sup> U |         | <sup>206</sup> Pb/ <sup>238</sup> U |         | <sup>207</sup> Pb/ <sup>206</sup> Pb |     | <sup>207</sup> Pb/ <sup>235</sup> U |    | <sup>206</sup> Pb/ <sup>238</sup> U |    | Concordance |
|------------|--------|-------|------|--------------------------------------|---------|-------------------------------------|---------|-------------------------------------|---------|--------------------------------------|-----|-------------------------------------|----|-------------------------------------|----|-------------|
|            |        |       |      | Ratio                                | 1σ      | Ratio                               | 1σ      | Ratio                               | 1σ      | Age(Ma)                              | 1σ  | Age(Ma)                             | 1σ | Age(Ma)                             | 1σ |             |
| QDL-7-3    |        |       |      |                                      |         |                                     |         |                                     |         |                                      |     |                                     |    |                                     |    |             |
| QDL-7-3-01 | 64     | 158   | 0.4  | 0.05562                              | 0.00271 | 0.58226                             | 0.02755 | 0.07611                             | 0.00115 | 439                                  | 109 | 466                                 | 18 | 473                                 | 7  | 98%         |
| QDL-7-3-02 | 244    | 845   | 0.29 | 0.05112                              | 0.00188 | 0.29679                             | 0.01043 | 0.04189                             | 0.00049 | 256                                  | 81  | 264                                 | 8  | 265                                 | 3  | 99%         |
| QDL-7-3-03 | 228    | 323   | 0.71 | 0.05509                              | 0.00235 | 0.49379                             | 0.02087 | 0.06435                             | 0.00081 | 417                                  | 96  | 407                                 | 14 | 402                                 | 5  | 98%         |
| QDL-7-3-04 | 153    | 383   | 0.4  | 0.06521                              | 0.00354 | 0.39019                             | 0.02078 | 0.04306                             | 0.00061 | 781                                  | 119 | 335                                 | 15 | 272                                 | 4  | 79%         |
| QDL-7-3-05 | 94     | 192   | 0.49 | 0.04817                              | 0.00315 | 0.26908                             | 0.01635 | 0.0405                              | 0.00072 | 109                                  | 144 | 242                                 | 13 | 256                                 | 4  | 94%         |
| QDL-7-3-06 | 72     | 107   | 0.67 | 0.04729                              | 0.00378 | 0.28735                             | 0.02003 | 0.04387                             | 0.00096 | 65                                   | 178 | 256                                 | 16 | 277                                 | 6  | 92%         |
| QDL-7-3-07 | 293    | 602   | 0.49 | 0.05072                              | 0.00231 | 0.27857                             | 0.01197 | 0.03961                             | 0.0006  | 228                                  | 106 | 250                                 | 10 | 250                                 | 4  | 99%         |
| QDL-7-3-08 | 344    | 663   | 0.52 | 0.0493                               | 0.00209 | 0.27253                             | 0.01107 | 0.03985                             | 0.00056 | 161                                  | 98  | 245                                 | 9  | 252                                 | 3  | 97%         |
| QDL-7-3-09 | 331    | 676   | 0.49 | 0.05217                              | 0.00204 | 0.30632                             | 0.01201 | 0.04226                             | 0.00064 | 300                                  | 89  | 271                                 | 9  | 267                                 | 4  | 98%         |
| QDL-7-3-10 | 160    | 339   | 0.47 | 0.05046                              | 0.0024  | 0.28386                             | 0.01348 | 0.04054                             | 0.00054 | 217                                  | 111 | 254                                 | 11 | 256                                 | 3  | 99%         |
| QDL-7-3-11 | 171    | 343   | 0.5  | 0.05381                              | 0.00261 | 0.3108                              | 0.01487 | 0.0418                              | 0.00063 | 361                                  | 114 | 275                                 | 12 | 264                                 | 4  | 95%         |
| QDL-7-3-12 | 92     | 161   | 0.57 | 0.05029                              | 0.00327 | 0.38922                             | 0.02331 | 0.05618                             | 0.00092 | 209                                  | 152 | 334                                 | 17 | 352                                 | 6  | 94%         |
| QDL-7-3-13 | 431    | 626   | 0.69 | 0.04981                              | 0.00197 | 0.30336                             | 0.01288 | 0.04357                             | 0.00063 | 187                                  | 88  | 269                                 | 10 | 275                                 | 4  | 97%         |
| QDL-7-3-14 | 207    | 533   | 0.39 | 0.04712                              | 0.00212 | 0.28148                             | 0.01326 | 0.04326                             | 0.00071 | 54                                   | 113 | 252                                 | 11 | 273                                 | 4  | 91%         |
| QDL-7-3-15 | 158    | 235   | 0.67 | 0.06044                              | 0.0028  | 0.65787                             | 0.03026 | 0.079                               | 0.00121 | 620                                  | 100 | 513                                 | 19 | 490                                 | 7  | 95%         |
| QDL-7-3-16 | 137    | 227   | 0.6  | 0.04886                              | 0.00326 | 0.28117                             | 0.01739 | 0.04192                             | 0.00067 | 143                                  | 157 | 252                                 | 14 | 265                                 | 4  | 94%         |
| QDL-7-3-17 | 170    | 370   | 0.46 | 0.05635                              | 0.00198 | 0.58975                             | 0.02079 | 0.07525                             | 0.00092 | 465                                  | 78  | 471                                 | 13 | 468                                 | 6  | 99%         |
| QDL-7-3-18 | 183    | 496   | 0.37 | 0.04924                              | 0.00224 | 0.29484                             | 0.01349 | 0.04303                             | 0.00062 | 167                                  | 103 | 262                                 | 11 | 272                                 | 4  | 96%         |
| QDL-7-3-19 | 892    | 1055  | 0.85 | 0.05035                              | 0.00184 | 0.2784                              | 0.00985 | 0.03982                             | 0.00046 | 209                                  | 85  | 249                                 | 8  | 252                                 | 3  | 99%         |
| QDL-7-3-20 | 85     | 257   | 0.33 | 0.05658                              | 0.0024  | 0.61472                             | 0.02608 | 0.07824                             | 0.00098 | 476                                  | 88  | 487                                 | 16 | 486                                 | 6  | 99%         |
| QDL-7-3-21 | 175    | 580   | 0.3  | 0.0473                               | 0.00215 | 0.25967                             | 0.01157 | 0.03972                             | 0.00044 | 65                                   | 104 | 234                                 | 9  | 251                                 | 3  | 93%         |
| QDL-7-3-22 | 159    | 229   | 0.69 | 0.05395                              | 0.00362 | 0.30346                             | 0.0189  | 0.04195                             | 0.00079 | 369                                  | 156 | 269                                 | 15 | 265                                 | 5  | 98%         |
| QDL-7-3-23 | 456    | 381   | 1.2  | 0.05376                              | 0.00231 | 0.4042                              | 0.01684 | 0.05472                             | 0.0007  | 361                                  | 96  | 345                                 | 12 | 343                                 | 4  | 99%         |

|            |     |     |      |         |         |         |         |         |         |      |     |      |    |      |    |     |
|------------|-----|-----|------|---------|---------|---------|---------|---------|---------|------|-----|------|----|------|----|-----|
| QDL-7-3-24 | 326 | 436 | 0.75 | 0.05509 | 0.0023  | 0.32943 | 0.01292 | 0.04363 | 0.00052 | 417  | 93  | 289  | 10 | 275  | 3  | 95% |
| QDL-7-3-25 | 168 | 421 | 0.4  | 0.06558 | 0.00195 | 1.16268 | 0.0369  | 0.1274  | 0.00152 | 794  | 62  | 783  | 17 | 773  | 9  | 98% |
| QDL-7-3-26 | 270 | 547 | 0.49 | 0.05235 | 0.00242 | 0.28336 | 0.01357 | 0.03904 | 0.00052 | 302  | 138 | 253  | 11 | 247  | 3  | 97% |
| QDL-7-3-27 | 219 | 547 | 0.4  | 0.04706 | 0.00183 | 0.27537 | 0.01071 | 0.04224 | 0.00053 | 54   | 89  | 247  | 9  | 267  | 3  | 92% |
| QDL-7-3-28 | 213 | 460 | 0.46 | 0.04828 | 0.00213 | 0.2898  | 0.01269 | 0.04356 | 0.00066 | 122  | 104 | 258  | 10 | 275  | 4  | 93% |
| QDL-7-3-29 | 222 | 810 | 0.27 | 0.05427 | 0.00173 | 0.6126  | 0.01938 | 0.08148 | 0.00092 | 383  | 72  | 485  | 12 | 505  | 6  | 96% |
| QDL-7-3-30 | 190 | 354 | 0.54 | 0.05162 | 0.00286 | 0.29404 | 0.01522 | 0.04138 | 0.00063 | 333  | 95  | 262  | 12 | 261  | 4  | 99% |
| QDL-7-3-31 | 149 | 289 | 0.51 | 0.05012 | 0.00271 | 0.3715  | 0.01986 | 0.05386 | 0.00079 | 211  | 121 | 321  | 15 | 338  | 5  | 94% |
| QDL-7-3-32 | 165 | 388 | 0.43 | 0.0515  | 0.00308 | 0.30207 | 0.01769 | 0.04261 | 0.00063 | 265  | 137 | 268  | 14 | 269  | 4  | 99% |
| QDL-7-3-33 | 275 | 602 | 0.46 | 0.05251 | 0.00192 | 0.30467 | 0.01129 | 0.04191 | 0.00052 | 309  | 83  | 270  | 9  | 265  | 3  | 97% |
| QDL-7-3-34 | 178 | 246 | 0.72 | 0.10934 | 0.00271 | 4.75646 | 0.12149 | 0.31427 | 0.00308 | 1789 | 45  | 1777 | 21 | 1762 | 15 | 99% |
| QDL-7-3-35 | 186 | 310 | 0.6  | 0.05209 | 0.00304 | 0.30046 | 0.0166  | 0.04193 | 0.00058 | 300  | 133 | 267  | 13 | 265  | 4  | 99% |
| QDL-7-3-36 | 111 | 164 | 0.68 | 0.05424 | 0.00398 | 0.33856 | 0.02339 | 0.0459  | 0.00078 | 389  | 167 | 296  | 18 | 289  | 5  | 97% |
| QDL-7-3-37 | 161 | 507 | 0.32 | 0.05125 | 0.00233 | 0.28799 | 0.01332 | 0.04084 | 0.0005  | 254  | 106 | 257  | 11 | 258  | 3  | 99% |
| QDL-7-3-38 | 291 | 400 | 0.73 | 0.05318 | 0.00241 | 0.29524 | 0.0133  | 0.04047 | 0.00051 | 345  | 102 | 263  | 10 | 256  | 3  | 97% |
| QDL-7-3-39 | 141 | 366 | 0.38 | 0.04998 | 0.00279 | 0.27612 | 0.01463 | 0.04033 | 0.00058 | 195  | 131 | 248  | 12 | 255  | 4  | 97% |
| QDL-7-3-40 | 288 | 502 | 0.57 | 0.05462 | 0.00259 | 0.30588 | 0.01431 | 0.0407  | 0.00049 | 398  | 106 | 271  | 11 | 257  | 3  | 94% |
| QDL-7-3-41 | 94  | 248 | 0.38 | 0.05542 | 0.00304 | 0.2999  | 0.01498 | 0.0391  | 0.00069 | 428  | 122 | 266  | 12 | 247  | 4  | 92% |
| QDL-7-3-42 | 219 | 642 | 0.34 | 0.05283 | 0.00229 | 0.28717 | 0.01215 | 0.03969 | 0.00057 | 320  | 98  | 256  | 10 | 251  | 4  | 97% |
| QDL-7-3-43 | 668 | 791 | 0.84 | 0.05587 | 0.00213 | 0.3214  | 0.01266 | 0.04164 | 0.00056 | 456  | 85  | 283  | 10 | 263  | 3  | 92% |
| QDL-7-3-44 | 103 | 335 | 0.31 | 0.05093 | 0.00243 | 0.29531 | 0.01411 | 0.0422  | 0.00066 | 239  | 109 | 263  | 11 | 266  | 4  | 98% |
| QDL-7-3-45 | 299 | 321 | 0.93 | 0.08653 | 0.00254 | 2.52864 | 0.07566 | 0.21092 | 0.00203 | 1350 | 57  | 1280 | 22 | 1234 | 11 | 96% |
| QDL-7-3-46 | 84  | 151 | 0.56 | 0.04845 | 0.00342 | 0.29371 | 0.01961 | 0.04321 | 0.00085 | 120  | 159 | 261  | 15 | 273  | 5  | 95% |
| QDL-7-3-47 | 167 | 554 | 0.3  | 0.05412 | 0.00259 | 0.30507 | 0.0146  | 0.04099 | 0.0006  | 376  | 107 | 270  | 11 | 259  | 4  | 95% |
| QDL-7-3-48 | 119 | 176 | 0.68 | 0.05626 | 0.00376 | 0.48968 | 0.0304  | 0.06397 | 0.00108 | 461  | 150 | 405  | 21 | 400  | 7  | 98% |
| QDL-7-3-49 | 162 | 349 | 0.46 | 0.05479 | 0.00368 | 0.31125 | 0.02209 | 0.04105 | 0.00073 | 467  | 145 | 275  | 17 | 259  | 5  | 94% |
| QDL-7-3-50 | 56  | 38  | 1.48 | 0.06241 | 0.00817 | 0.44514 | 0.04712 | 0.05396 | 0.00198 | 687  | 279 | 374  | 33 | 339  | 12 | 90% |
| QDL-7-3-51 | 133 | 372 | 0.36 | 0.05968 | 0.00266 | 0.63391 | 0.02922 | 0.07678 | 0.00117 | 591  | 94  | 499  | 18 | 477  | 7  | 95% |
| QDL-7-3-52 | 213 | 612 | 0.35 | 0.05214 | 0.00265 | 0.30074 | 0.01531 | 0.04148 | 0.00056 | 300  | 147 | 267  | 12 | 262  | 3  | 98% |
| QDL-7-3-53 | 134 | 340 | 0.39 | 0.0514  | 0.00285 | 0.29887 | 0.01649 | 0.04253 | 0.00065 | 257  | 131 | 266  | 13 | 268  | 4  | 98% |
| QDL-7-3-54 | 275 | 976 | 0.28 | 0.05252 | 0.00194 | 0.31937 | 0.01232 | 0.04387 | 0.00055 | 309  | 85  | 281  | 9  | 277  | 3  | 98% |
| QDL-7-3-55 | 56  | 379 | 0.15 | 0.06959 | 0.00201 | 1.58999 | 0.04732 | 0.1648  | 0.0018  | 917  | 60  | 966  | 19 | 983  | 10 | 98% |

|            |     |      |      |         |         |         |         |         |         |      |     |      |    |      |    |     |
|------------|-----|------|------|---------|---------|---------|---------|---------|---------|------|-----|------|----|------|----|-----|
| QDL-7-3-56 | 66  | 213  | 0.31 | 0.06077 | 0.00276 | 0.70485 | 0.03259 | 0.08374 | 0.00116 | 632  | 97  | 542  | 19 | 518  | 7  | 95% |
| QDL-2-7    |     |      |      |         |         |         |         |         |         |      |     |      |    |      |    |     |
| QDL-2-7-01 | 92  | 122  | 0.75 | 0.05064 | 0.00488 | 0.29262 | 0.02686 | 0.04301 | 0.00094 | 233  | 202 | 261  | 21 | 271  | 6  | 95% |
| QDL-2-7-02 | 182 | 280  | 0.65 | 0.07231 | 0.00231 | 1.52531 | 0.05481 | 0.15381 | 0.00315 | 994  | 65  | 941  | 22 | 922  | 18 | 98% |
| QDL-2-7-03 | 40  | 469  | 0.08 | 0.05749 | 0.00207 | 0.66583 | 0.03004 | 0.08336 | 0.00192 | 509  | 80  | 518  | 18 | 516  | 11 | 99% |
| QDL-2-7-04 | 152 | 179  | 0.85 | 0.05614 | 0.003   | 0.62207 | 0.03467 | 0.08079 | 0.00128 | 457  | 114 | 491  | 22 | 501  | 8  | 98% |
| QDL-2-7-05 | 50  | 372  | 0.13 | 0.04912 | 0.00241 | 0.29217 | 0.01441 | 0.04376 | 0.00081 | 154  | 115 | 260  | 11 | 276  | 5  | 94% |
| QDL-2-7-06 | 88  | 247  | 0.36 | 0.08127 | 0.00265 | 2.55852 | 0.13554 | 0.21725 | 0.00816 | 1228 | 69  | 1289 | 39 | 1267 | 43 | 98% |
| QDL-2-7-07 | 169 | 258  | 0.66 | 0.04778 | 0.00273 | 0.27224 | 0.01456 | 0.04222 | 0.00069 | 87   | 130 | 244  | 12 | 267  | 4  | 91% |
| QDL-2-7-08 | 187 | 252  | 0.74 | 0.05448 | 0.0031  | 0.28078 | 0.01474 | 0.03799 | 0.00062 | 391  | 132 | 251  | 12 | 240  | 4  | 95% |
| QDL-2-7-09 | 205 | 379  | 0.54 | 0.05138 | 0.00319 | 0.21753 | 0.01392 | 0.03045 | 0.0005  | 257  | 143 | 200  | 12 | 193  | 3  | 96% |
| QDL-2-7-10 | 176 | 207  | 0.85 | 0.0543  | 0.00395 | 0.29223 | 0.01783 | 0.03919 | 0.00065 | 383  | 165 | 260  | 14 | 248  | 4  | 95% |
| QDL-2-7-11 | 97  | 304  | 0.32 | 0.06039 | 0.00268 | 0.6996  | 0.03007 | 0.08371 | 0.00112 | 617  | 94  | 539  | 18 | 518  | 7  | 96% |
| QDL-2-7-12 | 70  | 107  | 0.66 | 0.07472 | 0.00339 | 1.66614 | 0.07418 | 0.16166 | 0.00245 | 1061 | 91  | 996  | 28 | 966  | 14 | 96% |
| QDL-2-7-13 | 52  | 132  | 0.39 | 0.05069 | 0.00678 | 0.20755 | 0.02053 | 0.03109 | 0.00077 | 233  | 276 | 191  | 17 | 197  | 5  | 96% |
| QDL-2-7-14 | 340 | 531  | 0.64 | 0.08137 | 0.00234 | 2.34368 | 0.0695  | 0.20659 | 0.00274 | 1231 | 57  | 1226 | 21 | 1211 | 15 | 98% |
| QDL-2-7-15 | 587 | 617  | 0.95 | 0.05078 | 0.00226 | 0.27736 | 0.01205 | 0.03961 | 0.00057 | 232  | 104 | 249  | 10 | 250  | 4  | 99% |
| QDL-2-7-16 | 216 | 251  | 0.86 | 0.05194 | 0.00316 | 0.30231 | 0.01705 | 0.04218 | 0.00064 | 283  | 108 | 268  | 13 | 266  | 4  | 99% |
| QDL-2-7-17 | 116 | 233  | 0.5  | 0.055   | 0.00349 | 0.3118  | 0.0198  | 0.0406  | 0.00074 | 413  | 143 | 276  | 15 | 257  | 5  | 92% |
| QDL-2-7-18 | 73  | 100  | 0.73 | 0.08152 | 0.01142 | 0.39285 | 0.04173 | 0.03885 | 0.00104 | 1235 | 278 | 336  | 30 | 246  | 6  | 68% |
| QDL-2-7-19 | 5   | 223  | 0.02 | 0.05247 | 0.00277 | 0.61693 | 0.03329 | 0.08444 | 0.00153 | 306  | 116 | 488  | 21 | 523  | 9  | 93% |
| QDL-2-7-20 | 202 | 327  | 0.62 | 0.04847 | 0.00387 | 0.18793 | 0.01357 | 0.02827 | 0.00054 | 124  | 178 | 175  | 12 | 180  | 3  | 97% |
| QDL-2-7-21 | 692 | 1201 | 0.58 | 0.05442 | 0.00234 | 0.59431 | 0.02451 | 0.07812 | 0.00125 | 387  | 98  | 474  | 16 | 485  | 7  | 97% |
| QDL-2-7-22 | 40  | 203  | 0.2  | 0.06774 | 0.00337 | 1.5148  | 0.07138 | 0.15994 | 0.00237 | 861  | 104 | 936  | 29 | 956  | 13 | 97% |
| QDL-2-7-23 | 126 | 431  | 0.29 | 0.04731 | 0.00272 | 0.26454 | 0.0149  | 0.04028 | 0.00057 | 65   | 133 | 238  | 12 | 255  | 4  | 93% |
| QDL-2-7-24 | 108 | 715  | 0.15 | 0.0585  | 0.00197 | 0.67187 | 0.02175 | 0.08211 | 0.00095 | 550  | 74  | 522  | 13 | 509  | 6  | 97% |
| QDL-2-7-25 | 77  | 143  | 0.54 | 0.05081 | 0.00407 | 0.30855 | 0.02253 | 0.04389 | 0.00079 | 232  | 187 | 273  | 17 | 277  | 5  | 98% |
| QDL-2-7-26 | 260 | 610  | 0.43 | 0.05341 | 0.0025  | 0.29465 | 0.01212 | 0.03946 | 0.00056 | 346  | 107 | 262  | 10 | 249  | 3  | 95% |
| QDL-2-7-27 | 105 | 309  | 0.34 | 0.06153 | 0.00269 | 0.67605 | 0.02823 | 0.07888 | 0.00099 | 657  | 94  | 524  | 17 | 489  | 6  | 93% |
| QDL-2-7-28 | 151 | 496  | 0.31 | 0.1094  | 0.00542 | 2.12559 | 0.17805 | 0.12366 | 0.00501 | 1791 | 89  | 1157 | 58 | 752  | 29 | 57% |
| QDL-2-7-29 | 87  | 201  | 0.43 | 0.09656 | 0.00373 | 3.0967  | 0.14571 | 0.22577 | 0.00575 | 1559 | 72  | 1432 | 36 | 1312 | 30 | 91% |
| QDL-2-7-30 | 198 | 476  | 0.42 | 0.05772 | 0.00275 | 0.37712 | 0.01707 | 0.04722 | 0.0007  | 520  | 106 | 325  | 13 | 297  | 4  | 91% |

|            |     |      |      |         |         |         |         |         |         |      |     |      |    |      |    |     |
|------------|-----|------|------|---------|---------|---------|---------|---------|---------|------|-----|------|----|------|----|-----|
| QDL-2-7-31 | 250 | 376  | 0.66 | 0.05077 | 0.00302 | 0.29006 | 0.01625 | 0.0409  | 0.0007  | 232  | 137 | 259  | 13 | 258  | 4  | 99% |
| QDL-2-7-32 | 162 | 317  | 0.51 | 0.06209 | 0.00253 | 0.72465 | 0.0283  | 0.08379 | 0.001   | 676  | 87  | 553  | 17 | 519  | 6  | 93% |
| QDL-2-7-33 | 273 | 316  | 0.87 | 0.05019 | 0.00294 | 0.31134 | 0.01841 | 0.04446 | 0.00076 | 211  | 142 | 275  | 14 | 280  | 5  | 98% |
| QDL-2-7-34 | 149 | 266  | 0.56 | 0.05647 | 0.00375 | 0.31856 | 0.01982 | 0.0407  | 0.00074 | 472  | 148 | 281  | 15 | 257  | 5  | 91% |
| QDL-2-7-35 | 278 | 449  | 0.62 | 0.0574  | 0.00277 | 0.3446  | 0.01608 | 0.04318 | 0.00064 | 506  | 106 | 301  | 12 | 273  | 4  | 90% |
| QDL-2-7-36 | 618 | 967  | 0.64 | 0.05264 | 0.00214 | 0.29841 | 0.01266 | 0.04027 | 0.00063 | 322  | 125 | 265  | 10 | 254  | 4  | 95% |
| QDL-2-7-37 | 174 | 236  | 0.74 | 0.05395 | 0.00399 | 0.20852 | 0.01423 | 0.02784 | 0.00063 | 369  | 167 | 192  | 12 | 177  | 4  | 91% |
| QDL-2-7-38 | 126 | 282  | 0.44 | 0.06211 | 0.00303 | 0.69829 | 0.03188 | 0.08062 | 0.0011  | 680  | 110 | 538  | 19 | 500  | 7  | 92% |
| QDL-2-7-39 | 228 | 411  | 0.56 | 0.04967 | 0.00319 | 0.19556 | 0.01125 | 0.02847 | 0.00046 | 189  | 145 | 181  | 10 | 181  | 3  | 99% |
| QDL-2-7-40 | 145 | 203  | 0.72 | 0.04628 | 0.00441 | 0.17065 | 0.01439 | 0.0266  | 0.00057 | 13   | 220 | 160  | 12 | 169  | 4  | 94% |
| QDL-2-7-41 | 558 | 1207 | 0.46 | 0.05701 | 0.00251 | 0.63943 | 0.02736 | 0.07952 | 0.00124 | 500  | 98  | 502  | 17 | 493  | 7  | 98% |
| QDL-2-7-42 | 233 | 676  | 0.34 | 0.05623 | 0.00239 | 0.63056 | 0.0254  | 0.07995 | 0.00117 | 461  | 94  | 496  | 16 | 496  | 7  | 99% |
| QDL-2-7-43 | 353 | 1120 | 0.31 | 0.05679 | 0.00214 | 0.64616 | 0.02366 | 0.08086 | 0.00107 | 483  | 83  | 506  | 15 | 501  | 6  | 99% |
| QDL-2-7-44 | 295 | 726  | 0.41 | 0.0494  | 0.00219 | 0.27124 | 0.01153 | 0.03925 | 0.00055 | 169  | 136 | 244  | 9  | 248  | 3  | 98% |
| QDL-2-7-45 | 184 | 307  | 0.6  | 0.06745 | 0.00275 | 1.17481 | 0.04445 | 0.12491 | 0.00155 | 852  | 118 | 789  | 21 | 759  | 9  | 96% |
| QDL-2-7-46 | 160 | 388  | 0.41 | 0.05074 | 0.00326 | 0.19327 | 0.01203 | 0.02714 | 0.00042 | 228  | 150 | 179  | 10 | 173  | 3  | 96% |
| QDL-2-7-47 | 32  | 370  | 0.09 | 0.10661 | 0.00383 | 4.56725 | 0.161   | 0.30842 | 0.00385 | 1743 | 65  | 1743 | 29 | 1733 | 19 | 99% |
| QDL-2-7-48 | 173 | 227  | 0.76 | 0.05575 | 0.00268 | 0.62072 | 0.03059 | 0.0802  | 0.00124 | 443  | 107 | 490  | 19 | 497  | 7  | 98% |
| QDL-2-7-49 | 111 | 412  | 0.27 | 0.05552 | 0.00231 | 0.62307 | 0.02573 | 0.0809  | 0.00104 | 432  | 93  | 492  | 16 | 501  | 6  | 98% |
| QDL-2-7-50 | 187 | 340  | 0.55 | 0.04703 | 0.00318 | 0.17475 | 0.0118  | 0.02703 | 0.00048 | 50   | 161 | 164  | 10 | 172  | 3  | 94% |
| QDL-2-7-51 | 181 | 184  | 0.99 | 0.05073 | 0.00417 | 0.28687 | 0.02138 | 0.04198 | 0.00083 | 228  | 188 | 256  | 17 | 265  | 5  | 96% |
| QDL-2-7-52 | 344 | 566  | 0.61 | 0.06297 | 0.00294 | 0.32897 | 0.01607 | 0.03749 | 0.00045 | 707  | 99  | 289  | 12 | 237  | 3  | 80% |
| QDL-2-7-53 | 133 | 361  | 0.37 | 0.05253 | 0.00293 | 0.2859  | 0.01562 | 0.03946 | 0.00053 | 309  | 128 | 255  | 12 | 249  | 3  | 97% |
| QDL-2-7-54 | 364 | 753  | 0.48 | 0.08778 | 0.00216 | 2.82954 | 0.06954 | 0.23191 | 0.00208 | 1377 | 52  | 1363 | 18 | 1345 | 11 | 98% |
| QDL-2-7-55 | 309 | 294  | 1.05 | 0.0547  | 0.00283 | 0.27493 | 0.01429 | 0.03634 | 0.00057 | 398  | 121 | 247  | 11 | 230  | 4  | 93% |
| QDL-2-7-56 | 106 | 257  | 0.41 | 0.06124 | 0.00258 | 0.68053 | 0.02861 | 0.08029 | 0.00103 | 656  | 95  | 527  | 17 | 498  | 6  | 94% |
| QDL-2-7-57 | 121 | 731  | 0.17 | 0.07056 | 0.00204 | 1.44524 | 0.04348 | 0.14704 | 0.00161 | 946  | 60  | 908  | 18 | 884  | 9  | 97% |
| QDL-1-2    |     |      |      |         |         |         |         |         |         |      |     |      |    |      |    |     |
| QDL-1-2-01 | 87  | 169  | 0.52 | 0.05693 | 0.00304 | 0.38058 | 0.02095 | 0.04854 | 0.00082 | 487  | 123 | 327  | 15 | 306  | 5  | 93% |
| QDL-1-2-02 | 58  | 87   | 0.67 | 0.0578  | 0.00688 | 0.19916 | 0.0201  | 0.0263  | 0.00072 | 520  | 265 | 184  | 17 | 167  | 5  | 90% |
| QDL-1-2-03 | 301 | 720  | 0.42 | 0.04943 | 0.0019  | 0.27592 | 0.01063 | 0.04023 | 0.00054 | 169  | 91  | 247  | 8  | 254  | 3  | 97% |
| QDL-1-2-04 | 221 | 309  | 0.72 | 0.04823 | 0.00362 | 0.17866 | 0.01251 | 0.02719 | 0.00049 | 109  | 170 | 167  | 11 | 173  | 3  | 96% |

|            |     |      |      |         |         |         |         |         |         |      |     |     |    |     |    |     |
|------------|-----|------|------|---------|---------|---------|---------|---------|---------|------|-----|-----|----|-----|----|-----|
| QDL-1-2-05 | 105 | 276  | 0.38 | 0.04938 | 0.00323 | 0.18951 | 0.01114 | 0.02798 | 0.00048 | 165  | 158 | 176 | 10 | 178 | 3  | 99% |
| QDL-1-2-06 | 227 | 332  | 0.68 | 0.05197 | 0.0028  | 0.28654 | 0.0151  | 0.04003 | 0.00064 | 283  | 150 | 256 | 12 | 253 | 4  | 98% |
| QDL-1-2-07 | 172 | 117  | 1.47 | 0.06606 | 0.00477 | 0.42065 | 0.02959 | 0.04716 | 0.00096 | 809  | 152 | 357 | 21 | 297 | 6  | 81% |
| QDL-1-2-08 | 699 | 1074 | 0.65 | 0.04772 | 0.00188 | 0.20053 | 0.00808 | 0.03022 | 0.0004  | 87   | 89  | 186 | 7  | 192 | 2  | 96% |
| QDL-1-2-09 | 211 | 386  | 0.55 | 0.05036 | 0.00336 | 0.18481 | 0.01231 | 0.02618 | 0.00043 | 213  | 156 | 172 | 11 | 167 | 3  | 96% |
| QDL-1-2-10 | 9   | 13   | 0.68 | 0.09493 | 0.02223 | 0.33624 | 0.04685 | 0.03764 | 0.00182 | 1528 | 454 | 294 | 36 | 238 | 11 | 78% |
| QDL-1-2-11 | 75  | 198  | 0.38 | 0.05383 | 0.00402 | 0.19729 | 0.01309 | 0.02743 | 0.00053 | 365  | 168 | 183 | 11 | 174 | 3  | 95% |
| QDL-1-2-12 | 49  | 173  | 0.28 | 0.04928 | 0.0031  | 0.29411 | 0.01732 | 0.04352 | 0.00078 | 161  | 148 | 262 | 14 | 275 | 5  | 95% |
| QDL-1-2-13 | 262 | 220  | 1.19 | 0.05461 | 0.00447 | 0.19318 | 0.01477 | 0.02621 | 0.00053 | 394  | 179 | 179 | 13 | 167 | 3  | 92% |
| QDL-1-2-14 | 123 | 175  | 0.7  | 0.04701 | 0.00478 | 0.19451 | 0.01824 | 0.03075 | 0.0007  | 50   | 226 | 180 | 16 | 195 | 4  | 92% |
| QDL-1-2-15 | 212 | 602  | 0.35 | 0.06827 | 0.00236 | 1.34424 | 0.04748 | 0.14265 | 0.00181 | 876  | 71  | 865 | 21 | 860 | 10 | 99% |
| QDL-1-2-16 | 72  | 171  | 0.42 | 0.05221 | 0.0044  | 0.22288 | 0.018   | 0.03167 | 0.00068 | 295  | 188 | 204 | 15 | 201 | 4  | 98% |
| QDL-1-2-17 | 196 | 276  | 0.71 | 0.04644 | 0.00304 | 0.1612  | 0.00948 | 0.02579 | 0.00043 | 20   | 148 | 152 | 8  | 164 | 3  | 92% |
| QDL-1-2-18 | 140 | 259  | 0.54 | 0.04642 | 0.00329 | 0.1718  | 0.01115 | 0.02751 | 0.00049 | 20   | 169 | 161 | 10 | 175 | 3  | 91% |
| QDL-1-2-19 | 224 | 308  | 0.73 | 0.04632 | 0.00324 | 0.15871 | 0.00997 | 0.02547 | 0.00043 | 13   | 163 | 150 | 9  | 162 | 3  | 91% |
| QDL-1-2-20 | 266 | 289  | 0.92 | 0.04863 | 0.00325 | 0.20342 | 0.01252 | 0.03028 | 0.00045 | 132  | 148 | 188 | 11 | 192 | 3  | 97% |
| QDL-1-2-21 | 408 | 413  | 0.99 | 0.05617 | 0.00441 | 0.19545 | 0.01374 | 0.0261  | 0.00056 | 457  | 179 | 181 | 12 | 166 | 4  | 91% |
| QDL-1-2-22 | 114 | 195  | 0.58 | 0.05557 | 0.00457 | 0.19631 | 0.01369 | 0.02638 | 0.00053 | 435  | 185 | 182 | 12 | 168 | 3  | 91% |
| QDL-1-2-23 | 399 | 442  | 0.9  | 0.05842 | 0.0031  | 0.21429 | 0.01108 | 0.02669 | 0.00041 | 546  | 112 | 197 | 9  | 170 | 3  | 85% |
| QDL-1-2-24 | 155 | 385  | 0.4  | 0.06115 | 0.00298 | 0.3363  | 0.01482 | 0.04043 | 0.00056 | 656  | 73  | 294 | 11 | 255 | 3  | 85% |
| QDL-1-2-25 | 310 | 664  | 0.47 | 0.05095 | 0.00213 | 0.2846  | 0.01241 | 0.04059 | 0.00062 | 239  | 96  | 254 | 10 | 256 | 4  | 99% |
| QDL-1-2-26 | 128 | 274  | 0.47 | 0.04809 | 0.00337 | 0.17586 | 0.01164 | 0.02697 | 0.00048 | 106  | 156 | 164 | 10 | 172 | 3  | 95% |
| QDL-1-2-27 | 267 | 643  | 0.41 | 0.05474 | 0.00265 | 0.29883 | 0.01075 | 0.04003 | 0.00052 | 467  | 103 | 265 | 8  | 253 | 3  | 95% |
| QDL-1-2-28 | 217 | 294  | 0.74 | 0.05386 | 0.00315 | 0.20169 | 0.01091 | 0.02753 | 0.00043 | 365  | 136 | 187 | 9  | 175 | 3  | 93% |
| QDL-1-2-29 | 375 | 392  | 0.96 | 0.05067 | 0.00351 | 0.17803 | 0.01133 | 0.0257  | 0.00042 | 233  | 166 | 166 | 10 | 164 | 3  | 98% |
| QDL-1-2-30 | 436 | 233  | 1.87 | 0.04923 | 0.0033  | 0.23104 | 0.01403 | 0.03422 | 0.00058 | 167  | 143 | 211 | 12 | 217 | 4  | 97% |
| QDL-1-2-31 | 444 | 357  | 1.24 | 0.05388 | 0.00327 | 0.22372 | 0.01285 | 0.03036 | 0.00056 | 365  | 132 | 205 | 11 | 193 | 3  | 93% |
| QDL-1-2-32 | 51  | 173  | 0.29 | 0.05231 | 0.00424 | 0.27854 | 0.02003 | 0.03865 | 0.00075 | 298  | 187 | 249 | 16 | 244 | 5  | 97% |
| QDL-1-2-33 | 192 | 304  | 0.63 | 0.05341 | 0.00394 | 0.18955 | 0.01272 | 0.02587 | 0.0005  | 346  | 167 | 176 | 11 | 165 | 3  | 93% |
| QDL-1-2-34 | 429 | 265  | 1.62 | 0.05492 | 0.00372 | 0.19586 | 0.01208 | 0.02598 | 0.00053 | 409  | 152 | 182 | 10 | 165 | 3  | 90% |
| QDL-1-2-35 | 181 | 313  | 0.58 | 0.04977 | 0.0026  | 0.26436 | 0.01348 | 0.03845 | 0.00059 | 183  | 122 | 238 | 11 | 243 | 4  | 97% |
| QDL-1-2-36 | 119 | 441  | 0.27 | 0.05742 | 0.00207 | 0.61625 | 0.02182 | 0.07748 | 0.00095 | 509  | 77  | 487 | 14 | 481 | 6  | 98% |

|            |      |      |      |         |         |         |         |         |         |      |     |      |    |      |    |     |
|------------|------|------|------|---------|---------|---------|---------|---------|---------|------|-----|------|----|------|----|-----|
| QDL-1-2-37 | 131  | 314  | 0.42 | 0.05462 | 0.00349 | 0.30388 | 0.01818 | 0.04088 | 0.00078 | 398  | 172 | 269  | 14 | 258  | 5  | 95% |
| QDL-1-2-38 | 267  | 326  | 0.82 | 0.05202 | 0.00365 | 0.18269 | 0.01131 | 0.02564 | 0.00044 | 287  | 161 | 170  | 10 | 163  | 3  | 95% |
| QDL-1-2-39 | 282  | 708  | 0.4  | 0.05446 | 0.00225 | 0.30225 | 0.01243 | 0.04009 | 0.00047 | 391  | 93  | 268  | 10 | 253  | 3  | 94% |
| QDL-1-2-40 | 535  | 1048 | 0.51 | 0.05355 | 0.00236 | 0.20017 | 0.00837 | 0.02721 | 0.00035 | 354  | 100 | 185  | 7  | 173  | 2  | 93% |
| QDL-1-2-41 | 89   | 204  | 0.44 | 0.05192 | 0.00429 | 0.1877  | 0.01234 | 0.0268  | 0.00055 | 283  | 191 | 175  | 11 | 171  | 3  | 97% |
| QDL-1-2-42 | 146  | 302  | 0.48 | 0.0503  | 0.00415 | 0.17963 | 0.01312 | 0.0263  | 0.0005  | 209  | 193 | 168  | 11 | 167  | 3  | 99% |
| QDL-1-2-43 | 314  | 256  | 1.23 | 0.05207 | 0.00423 | 0.22003 | 0.01732 | 0.03099 | 0.00063 | 287  | 182 | 202  | 14 | 197  | 4  | 97% |
| QDL-1-2-44 | 115  | 191  | 0.6  | 0.08593 | 0.00498 | 0.33948 | 0.01948 | 0.0289  | 0.00059 | 1337 | 118 | 297  | 15 | 184  | 4  | 52% |
| QDL-1-2-45 | 161  | 214  | 0.75 | 0.05444 | 0.00445 | 0.1927  | 0.01511 | 0.02582 | 0.00052 | 391  | 185 | 179  | 13 | 164  | 3  | 91% |
| QDL-1-2-46 | 115  | 246  | 0.47 | 0.05415 | 0.00399 | 0.28595 | 0.01949 | 0.03899 | 0.00065 | 376  | 194 | 255  | 15 | 247  | 4  | 96% |
| QDL-1-2-47 | 168  | 368  | 0.46 | 0.05479 | 0.00332 | 0.2819  | 0.01539 | 0.03827 | 0.00067 | 467  | 169 | 252  | 12 | 242  | 4  | 95% |
| QDL-1-2-48 | 126  | 264  | 0.48 | 0.05823 | 0.00259 | 0.58048 | 0.02496 | 0.07279 | 0.00106 | 539  | 96  | 465  | 16 | 453  | 6  | 97% |
| QDL-1-2-49 | 1131 | 1288 | 0.88 | 0.0543  | 0.00315 | 0.31101 | 0.01995 | 0.03977 | 0.00064 | 383  | 127 | 275  | 15 | 251  | 4  | 91% |
| QDL-1-2-50 | 248  | 396  | 0.63 | 0.05916 | 0.00251 | 0.65885 | 0.02922 | 0.08029 | 0.00106 | 572  | 91  | 514  | 18 | 498  | 6  | 96% |
| QDL-1-2-51 | 125  | 239  | 0.53 | 0.04971 | 0.00382 | 0.18855 | 0.01405 | 0.02763 | 0.00056 | 189  | 161 | 175  | 12 | 176  | 4  | 99% |
| QDL-1-2-52 | 41   | 71   | 0.57 | 0.08046 | 0.0038  | 2.33037 | 0.11096 | 0.21008 | 0.00319 | 1209 | 88  | 1222 | 34 | 1229 | 17 | 99% |
| QDL-1-2-53 | 608  | 1507 | 0.4  | 0.04985 | 0.00163 | 0.26482 | 0.00927 | 0.03823 | 0.00044 | 187  | 76  | 239  | 7  | 242  | 3  | 98% |
| QDL-1-2-54 | 268  | 471  | 0.57 | 0.05104 | 0.00228 | 0.28283 | 0.01324 | 0.04007 | 0.00058 | 243  | 71  | 253  | 10 | 253  | 4  | 99% |
| QDL-1-2-55 | 269  | 561  | 0.48 | 0.0502  | 0.00281 | 0.17721 | 0.00939 | 0.0259  | 0.0004  | 211  | 125 | 166  | 8  | 165  | 3  | 99% |
| QDL-1-2-56 | 261  | 535  | 0.49 | 0.05088 | 0.00228 | 0.27267 | 0.01218 | 0.03916 | 0.00056 | 235  | 108 | 245  | 10 | 248  | 3  | 98% |
| QDL-1-2-57 | 26   | 683  | 0.04 | 0.05278 | 0.00164 | 0.52844 | 0.01764 | 0.07242 | 0.00088 | 320  | 66  | 431  | 12 | 451  | 5  | 95% |
| QDL-1-2-58 | 85   | 346  | 0.25 | 0.04641 | 0.00257 | 0.20355 | 0.01146 | 0.03221 | 0.00053 | 20   | 126 | 188  | 10 | 204  | 3  | 91% |

Table S2. Lu-Hf isotopic analyses of zircons from Tongjiang accretionary complex matrix.

| Sample No. | <i>t</i> (Ma) | <sup>176</sup> Yb/ <sup>177</sup> Hf | 2σ       | <sup>176</sup> Lu/ <sup>177</sup> Hf | 2σ       | <sup>176</sup> Hf/ <sup>177</sup> Hf | 2σ       | ε <sub>Hf</sub> ( <i>t</i> ) | T <sub>DM1</sub> | T <sub>DM2</sub> | <i>f</i> <sub>Lu/Hf</sub> |
|------------|---------------|--------------------------------------|----------|--------------------------------------|----------|--------------------------------------|----------|------------------------------|------------------|------------------|---------------------------|
| QDL-7-3    |               |                                      |          |                                      |          |                                      |          |                              |                  |                  |                           |
| QDL-7-3-01 | 473           | 0.033058                             | 0.001146 | 0.000823                             | 0.000024 | 0.282566                             | 0.000024 | 2.9                          | 967              | 1265             | −0.98                     |
| QDL-7-3-02 | 265           | 0.040550                             | 0.000513 | 0.001164                             | 0.000027 | 0.282579                             | 0.000025 | −1.2                         | 958              | 1366             | −0.96                     |
| QDL-7-3-03 | 402           | 0.056342                             | 0.000923 | 0.001551                             | 0.000022 | 0.282273                             | 0.000024 | −9.2                         | 1403             | 1976             | −0.95                     |
| QDL-7-3-12 | 352           | 0.055649                             | 0.000700 | 0.001625                             | 0.000019 | 0.282776                             | 0.000024 | 7.5                          | 686              | 876              | −0.95                     |

|            |      |          |          |          |          |          |          |       |      |      |       |
|------------|------|----------|----------|----------|----------|----------|----------|-------|------|------|-------|
| QDL-7-3-22 | 265  | 0.053442 | 0.002234 | 0.001392 | 0.000053 | 0.282547 | 0.000023 | −2.4  | 1009 | 1440 | −0.96 |
| QDL-7-3-26 | 247  | 0.047250 | 0.002350 | 0.001290 | 0.000059 | 0.282605 | 0.000022 | −0.7  | 924  | 1319 | −0.96 |
| QDL-7-3-29 | 505  | 0.036751 | 0.000654 | 0.000977 | 0.000011 | 0.282389 | 0.000022 | −2.7  | 1219 | 1646 | −0.97 |
| QDL-7-3-33 | 265  | 0.061855 | 0.001069 | 0.001683 | 0.000027 | 0.282783 | 0.000023 | 5.9   | 678  | 911  | −0.95 |
| QDL-7-3-40 | 257  | 0.050965 | 0.001333 | 0.001430 | 0.000053 | 0.282574 | 0.000020 | −1.6  | 972  | 1385 | −0.96 |
| QDL-7-3-41 | 247  | 0.027939 | 0.000362 | 0.000803 | 0.000014 | 0.282620 | 0.000021 | −0.1  | 892  | 1281 | −0.98 |
| QDL-7-3-45 | 1350 | 0.046448 | 0.000812 | 0.001186 | 0.000011 | 0.282159 | 0.000024 | 7.2   | 1550 | 1667 | −0.96 |
| QDL-7-3-49 | 259  | 0.032869 | 0.000275 | 0.000911 | 0.000004 | 0.282597 | 0.000021 | −0.7  | 926  | 1326 | −0.97 |
| QDL-7-3-55 | 983  | 0.067033 | 0.001945 | 0.001729 | 0.000057 | 0.282202 | 0.000020 | 0.5   | 1511 | 1809 | −0.95 |
| QDL-2-7    |      |          |          |          |          |          |          |       |      |      |       |
| QDL-2-7-01 | 271  | 0.035459 | 0.001788 | 0.001017 | 0.000055 | 0.282938 | 0.000024 | 11.7  | 445  | 549  | −0.97 |
| QDL-2-7-02 | 922  | 0.020589 | 0.001652 | 0.000535 | 0.000044 | 0.282303 | 0.000022 | 3.5   | 1324 | 1572 | −0.98 |
| QDL-2-7-06 | 1228 | 0.029489 | 0.000947 | 0.000772 | 0.000027 | 0.282363 | 0.000022 | 12.2  | 1249 | 1262 | −0.98 |
| QDL-2-7-08 | 240  | 0.099295 | 0.003089 | 0.002593 | 0.000100 | 0.282639 | 0.000025 | 0.2   | 907  | 1259 | −0.92 |
| QDL-2-7-13 | 197  | 0.044110 | 0.000821 | 0.001249 | 0.000016 | 0.282794 | 0.000023 | 5     | 654  | 921  | −0.96 |
| QDL-2-7-23 | 255  | 0.022816 | 0.000230 | 0.000612 | 0.000003 | 0.282504 | 0.000022 | −4    | 1049 | 1535 | −0.98 |
| QDL-2-7-37 | 177  | 0.075738 | 0.000865 | 0.002230 | 0.000030 | 0.282728 | 0.000027 | 2.1   | 768  | 1090 | −0.93 |
| QDL-2-7-40 | 169  | 0.059170 | 0.001594 | 0.001716 | 0.000054 | 0.282897 | 0.000026 | 7.9   | 514  | 709  | −0.95 |
| QDL-2-7-41 | 493  | 0.036262 | 0.000607 | 0.001037 | 0.000025 | 0.282475 | 0.000023 | 0     | 1101 | 1462 | −0.97 |
| QDL-2-7-43 | 501  | 0.057110 | 0.001183 | 0.001565 | 0.000048 | 0.282358 | 0.000024 | −4.1  | 1283 | 1730 | −0.95 |
| QDL-2-7-46 | 173  | 0.026340 | 0.000631 | 0.000783 | 0.000027 | 0.282838 | 0.000024 | 6     | 584  | 833  | −0.98 |
| QDL-2-7-50 | 172  | 0.061613 | 0.002797 | 0.001972 | 0.000096 | 0.282120 | 0.000028 | −19.5 | 1638 | 2451 | −0.94 |
| QDL-2-7-54 | 1377 | 0.068919 | 0.001215 | 0.001824 | 0.000030 | 0.282071 | 0.000023 | 4.1   | 1701 | 1882 | −0.95 |
| QDL-1-2    |      |          |          |          |          |          |          |       |      |      |       |
| QDL-1-2-05 | 178  | 0.030939 | 0.000574 | 0.000912 | 0.000016 | 0.282859 | 0.000023 | 6.9   | 556  | 783  | −0.97 |
| QDL-1-2-08 | 192  | 0.106533 | 0.002283 | 0.002872 | 0.000044 | 0.282861 | 0.000024 | 7     | 583  | 785  | −0.91 |
| QDL-1-2-09 | 167  | 0.079775 | 0.002028 | 0.002217 | 0.000065 | 0.282895 | 0.000024 | 7.8   | 523  | 717  | −0.93 |
| QDL-1-2-15 | 860  | 0.060574 | 0.001363 | 0.001513 | 0.000031 | 0.282237 | 0.000020 | −0.8  | 1453 | 1793 | −0.95 |
| QDL-1-2-17 | 164  | 0.064685 | 0.002154 | 0.001802 | 0.000064 | 0.282729 | 0.000023 | 1.9   | 758  | 1092 | −0.95 |
| QDL-1-2-31 | 193  | 0.072309 | 0.000644 | 0.002034 | 0.000013 | 0.282824 | 0.000021 | 5.8   | 624  | 862  | −0.94 |
| QDL-1-2-36 | 481  | 0.035728 | 0.000208 | 0.001004 | 0.000003 | 0.282540 | 0.000021 | 2.1   | 1008 | 1322 | −0.97 |

|            |      |          |          |          |          |          |          |       |      |      |       |
|------------|------|----------|----------|----------|----------|----------|----------|-------|------|------|-------|
| QDL-1-2-37 | 258  | 0.029240 | 0.000490 | 0.000957 | 0.000020 | 0.282837 | 0.000021 | 7.8   | 588  | 785  | −0.97 |
| QDL-1-2-38 | 163  | 0.040865 | 0.001257 | 0.001088 | 0.000037 | 0.281956 | 0.000022 | −25.4 | 1828 | 2814 | −0.97 |
| QDL-1-2-45 | 164  | 0.036089 | 0.000848 | 0.000991 | 0.000014 | 0.282880 | 0.000021 | 7.3   | 527  | 744  | −0.97 |
| QDL-1-2-49 | 251  | 0.072092 | 0.002696 | 0.002004 | 0.000071 | 0.282661 | 0.000022 | 1.3   | 861  | 1199 | −0.94 |
| QDL-1-2-52 | 1209 | 0.032922 | 0.001240 | 0.000889 | 0.000050 | 0.282084 | 0.000025 | 1.7   | 1642 | 1902 | −0.97 |
| QDL-1-2-56 | 248  | 0.030790 | 0.000588 | 0.000906 | 0.000012 | 0.282582 | 0.000022 | −1.4  | 946  | 1365 | −0.97 |

---
